# Supplementary material for: Comprehensive assessment of depression risk and its behavioral determinants among adolescents: a multi-country study
Source: Research Square preprint supplement (doi:10.21203/rs.3.rs-1402117/v1), 2022-03-11
Supplement: Supplementary file 1 [file 14d52e44d1ab372fd5bd51a1.docx]

Supplementary table 4: Prevalence of exposure to school violence and insufficient interactions with parents and friends among adolescents by gender.

| **Country1 (n=20)** | **Exposure to school violence2, proportion (95% CI)** | | **Insufficient interactions with parents3, proportion (95% CI)** | | **Insufficient interactions with friends4, proportion (95% CI)** | |
| --- | --- | --- | --- | --- | --- | --- |
|
| **Boys (n=23,192)** | **Girls (n=28,405)** | **Boys (n=23,192)** | **Girls (n=28,405)** | **Boys (n=23,192)** | **Girls (n=28,405)** |
| Afghanistan | 36.9 (32.2, 41.9) | 22.4 (19.1, 26.2) | 55.4 (50.3, 60.3) | 40.7 (36.5, 45.0) | 48.5 (43.6, 53.5) | 47.4 (43.1, 51.7) |
| Bahamas | 32.0 (27.1, 37.4) | 21.2 (17.6, 25.3) | 67.7 (62.0, 72.9) | 66.0 (61.4, 70.4) | 81.4 (76.5, 85.5) | 77.6 (73.4, 81.3) |
| Bahrain | 41.9 (39.0, 44.8) | 20.8 (18.7, 23.1) | 70.4 (67.7, 73.0) | 70.0 (67.4, 72.4) | 41.4 (38.5, 44.3) | 32.0 (29.6, 34.6) |
| Bangladesh | 38.5 (34.2, 42.9) | 29.3 (26.0, 32.7) | 67.7 (63.4, 71.7) | 57.2 (53.6, 60.6) | 53.0 (48.5, 57.4) | 63.4 (60.0, 66.7) |
| Benin | 29.9 (26.9, 33.1) | 24.6 (21.8, 27.7) | 76.0 (73.1, 78.7) | 69.4 (66.1, 72.5) | 80.3 (77.5, 82.9) | 85.0 (82.3, 87.3) |
| Brunei | 25.0 (22.2, 28.1) | 13.7 (11.6, 16.0) | 79.2 (76.3, 81.8) | 82.7 (80.2, 84.9) | 48.5 (45.1, 52.0) | 42.4 (39.3, 45.6) |
| Cook Islands | 34.4 (28.6, 40.6) | 27.9 (22.7, 33.8) | 79.3 (73.8, 83.9) | 79.6 (74.1, 84.2) | 50.3 (44.1, 56.6) | 57.4 (51.3, 63.3) |
| Fiji | 31.6 (28.8, 34.4) | 21.7 (19.5, 24.1) | 63.0 (60.1, 65.9) | 55.2 (52.4, 58.0) | 58.8 (55.8, 61.7) | 59.3 (56.5, 62.0) |
| Indonesia | 25.0 (23.4, 26.5) | 11.7 (10.8, 12.8) | 74.5 (72.9, 76.0) | 67.1 (65.6, 68.6) | 65.9 (64.1, 67.5) | 57.2 (55.6, 58.7) |
| Kuwait | 37.2 (34.1, 40.4) | 21.7 (19.3, 24.3) | 75.3 (72.4, 78.0) | 80.1 (77.5, 82.5) | 54.5 (51.3, 57.7) | 54.5 (51.3, 57.5) |
| Laos | 8.03 (6.55, 9.80) | 4.62 (3.68, 5.80) | 89.9 (87.9, 91.6) | 87.9 (86.1, 89.5) | 82.4 (80.0, 84.6) | 80.2 (78.0, 82.3) |
| Mongolia | 38.1 (35.9, 40.3) | 14.3 (12.9, 15.8) | 78.7 (76.8, 80.5) | 71.6 (69.7, 73.4) | 76.8 (74.9, 78.7) | 79.8 (78.1, 81.4) |
| Namibia | 41.3 (38.7, 44.1) | 31.4 (29.1, 33.9) | 67.7 (65.1, 70.2) | 65.8 (63.2, 68.2) | 79.5 (77.2, 81.6) | 79.5 (77.2, 81.6) |
| Nepal | 50.0 (47.3, 52.7) | 41.3 (38.7, 43.9) | 58.0 (55.4, 60.6) | 54.8 (52.2, 57.4) | 52.6 (49.9, 55.2) | 51.5 (48.9, 54.1) |
| Philippines | 39.8 (37.7, 41.9) | 29.7 (27.9, 31.6) | 77.6 (75.8, 79.4) | 76.1 (74.3, 77.7) | 66.1 (64.0, 68.2) | 67.0 (65.1, 68.8) |
| Polynesia | 24.2 (21.6, 27.1) | 14.2 (12.2, 16.5) | 66.7 (63.5, 69.7) | 68.5 (65.6, 71.2) | 43.2 (40.0, 46.4) | 37.3 (34.4, 40.2) |
| Thailand | 29.5 (26.5, 32.7) | 12.8 (10.9, 14.9) | 75.9 (72.8, 78.7) | 69.9 (67.2, 72.6) | 69.4 (66.1, 72.5) | 56.3 (53.4, 59.2) |
| Timor-Leste | 42.9 (38.3, 47.6) | 31.1 (27.1, 35.4) | 94.5 (91.8, 96.3) | 91.2 (88.1, 93.5) | 75.6 (71.3, 79.5) | 73.2 (68.9, 77.2) |
| Tuvalu | 62.6 (52.3, 71.8) | 34.0 (25.9, 43.2) | 82.7 (73.6, 89.1) | 81.0 (72.7, 87.3) | 80.2 (70.7, 87.2) | 69.9 (60.9, 77.7) |
| Yemen | 46.6 (42.4, 50.8) | 19.4 (16.6, 22.6) | 84.0 (80.5, 86.9) | 80.9 (77.8, 83.7) | 70.8 (66.8, 74.5) | 62.9 (59.2, 66.4) |

Legend: OR: odds ratio; CI: confidence interval

1 Countries that had Global School-based Student Health Survey data available from 2013 or later.

2 Exposure to school violence considered four components - physical attack, fight, injury, and bulling.

3 Interactions with parent consisted of two components – frequency of missing school without permission and how frequent participants found their parents understanding their problems.

4Interactions with friends had two components – number of close friends and if participants find their classmates helpful and kind.
