# Supplementary material for: Comprehensive assessment of depression risk and its behavioral determinants among adolescents: a multi-country study
Source: Research Square preprint supplement (doi:10.21203/rs.3.rs-1402117/v1), 2022-03-11
Supplement: Supplementary file 2 [file 385c337c5468f550015442b9.docx]

Supplementary table 3: Prevalence of unhealthy sedentary behaviour and tobacco use among adolescents by gender.

| **Countries1 (n=20)** | **Unhealthy sedentary behavior2, % proportion (95% CI)** | | **Tobacco use3, % proportion (95% CI)** | |
| --- | --- | --- | --- | --- |
|
| **Boys (n=23,192)** | **Girls (n=28,405)** | **Boys (n=23,192)** | **Girls (n=28,405)** |
| Afghanistan | 56.9 (51.9, 61.8) | 52.9 (48.6, 57.1) | 4.2 (2.7, 6.8) | 0.7 (0.3, 1.6) |
| Bahamas | 78.2 (73.3, 82.4) | 82.3 (78.3, 85.7) | 2.3 (1.2, 4.9) | 1.7 (0.8, 3.4) |
| Bahrain | 76.8 (74.3, 79.2) | 91.0 (89.3, 92.4) | 25.3 (22.9, 27.9) | 4.1 (3.1, 5.3) |
| Bangladesh | 58.3 (53.8, 62.7) | 53.5 (50.0, 57.0) | 8.8 (7.0, 10.9) | 0.8 (0.4, 1.5) |
| Benin | 57.1 (53.8, 60.3) | 55.3 (51.8, 58.7) | 3.5 (2.4, 5.3) | 0.6 (0.2, 1.4) |
| Brunei | 81.3 (78.5, 83.9) | 86.4 (84.1, 88.5) | 12.1 (10.0, 14.6) | 1.3 (0.8, 2.2) |
| Cook Islands | 72.4 (66.5, 77.6) | 75.6 (70.0, 80.5) | 9.5 (6.4, 13.9) | 6.2 (3.9, 9.8) |
| Fiji | 57.9 (54.9, 60.9) | 59.5 (56.7, 62.2) | 8.3 (6.8, 10.1) | 3.7 (2.8, 4.9) |
| Indonesia | 64.5 (62.8, 66.2) | 64.7 (63.2, 66.2) | 10.4 (9.4, 11.6) | 0.5 (0.3, 0.8) |
| Kuwait | 87.2 (84.9, 89.2) | 89.9 (87.9, 91.6) | 21.5 (18.9, 24.3) | 6.1 (4.8, 7.7) |
| Laos | 55.4 (52.4, 58.3) | 62.1 (59.5, 64.6) | 4.3 (3.0, 6.1) | 0.3 (0.1, 0.7) |
| Mongolia | 75.6 (73.6, 77.5) | 76.4 (74.6, 78.1) | 9.8 (8.5, 11.3) | 3.0 (2.3, 3.7) |
| Namibia | 66.1 (63.5, 68.6) | 63.9 (61.4, 66.4) | 7.5 (6.1, 9.1) | 3.9 (3.0, 5.2) |
| Nepal | 38.1 (35.6, 40.8) | 29.9 (27.6, 32.3) | 4.8 (3.7, 6.1) | 2.1 (1.4, 3.2) |
| Philippines | 59.6 (57.5, 61.7) | 58.5 (56.5, 60.4) | 7.4 (6.4, 8.6) | 2.1 (1.5, 2.9) |
| Polynesia | 75.0 (72.1, 77.7) | 77.3 (74.7, 79.8) | 11.1 (9.3, 13.3) | 18.3 (16.2, 20.7) |
| Thailand | 81.3 (78.4, 83.9) | 84.3 (82.1, 86.3) | 12.1 (10.1, 14.4) | 1.8 (1.2, 2.9) |
| Timor-Leste | 52.4 (47.7, 57.1) | 47.6 (43.0, 52.2) | 17.9 (14.5, 21.9) | 4.3 (2.8, 6.6) |
| Tuvalu | 44.0 (34.2, 54.2) | 37.2 (28.8, 46.5) | 14.2 (8.2, 23.7) | 2.5 (0.8, 7.5) |
| Yemen | 52.8 (48.6, 57.0) | 56.6 (52.9, 60.3) | 6.3 (4.4, 9.1) | 3.4 (2.3, 5.0) |

Legend: OR: odds ratio; CI: confidence interval.

1 Countries that had Global School-based Student Health Survey data available from 2013 or later.

2 Unhealthy sedentary behaviour for adolescents was defined as having screen time one hour or more per day.

3 Tobacco use considered adolescents who used cigarette or any other form of tobacco for 3 days or more last one month.
